# Supplementary material
Source: PubMed Central journal article supplement (PMC6588183)

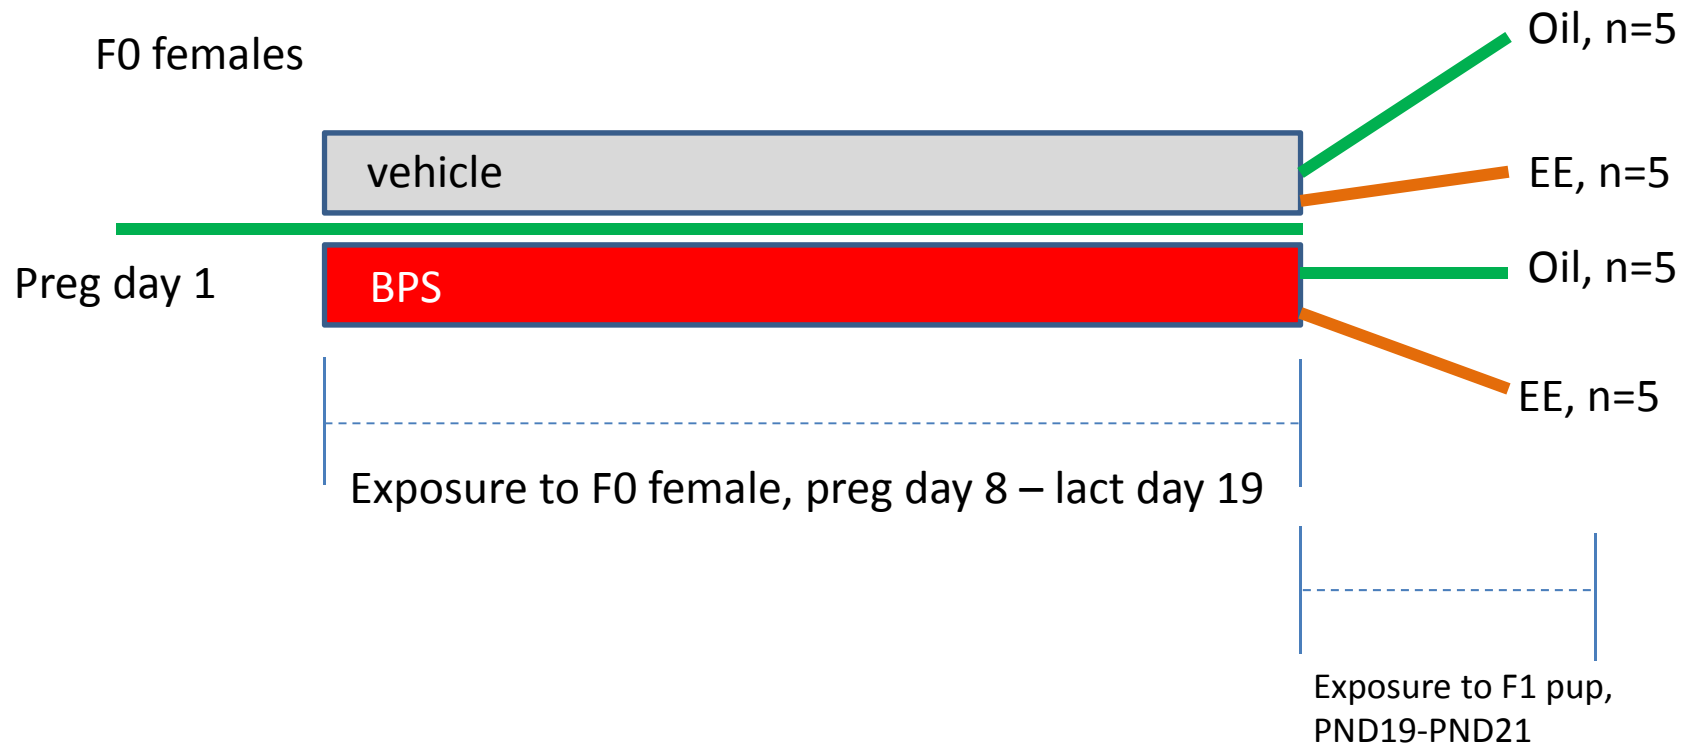

Supplement: NIHMS877885-supplement-1.pdf [file NIHMS877885-supplement-1.pdf]
